# Supplementary material for: 5-Arylidenerhodanines as P-gp Modulators: An Interesting Effect of the Carboxyl Group on ABCB1 Function in Multidrug-Resistant Cancer Cells
Source: MDPI journal article supplement (doi:10.3390/ijms231810812), 2022-09-16
Supplement: s1 [file s1]

## Supplementary Materials

**Table S1.** The interplanar angles (°) between the planes containing rings.

| Planes                | 3                              | 7                                | 11       |
|-----------------------|--------------------------------|----------------------------------|----------|
| rhodanine/benzylidene | mol. A 6.0(1)<br>mol. B 6.3(1) | mol. A 18.1(1)<br>mol. B 15.7(1) | 7.3(1)   |
| benzylidene/phenyl 1  | mol. A 19.4(1)<br>mol. B 50(1) | mol. A 24.5(1)<br>mol. B 20.6(1) | 70.24(5) |
| benzylidene/phenyl 2  | -                              | -                                | 56.06(6) |
| phenyl 1/ phenyl 2    | -                              | -                                | 85.18(5) |

**Table S2.** Parameters of intermolecular interaction in the crystals of 3, 7 and 11.

| Cmpd. | D-H...A         | H...A (Å) | D...A (Å) | D-H-A (°) | Symmetry code    |
|-------|-----------------|-----------|-----------|-----------|------------------|
| 3     | O3A-H3A...O2B   | 1.78(3)   | 2.674(2)  | 173(3)    | -x+1, -y+1, -z+1 |
|       | O3B-H3B...O2A   | 1.78(4)   | 2.627(2)  | 170(4)    | -x+1, -y+1, -z+1 |
|       | C6A-H6A...O1A   | 2.45      | 3.339(2)  | 159.7     | -x, -y+2, -z+1   |
|       | C6B-H6B...O1B   | 2.32      | 3.193(2)  | 156.6     | -x+1, -y+2, -z+1 |
|       | C15B-H15B...S1B | 2.99      | 3.572(2)  | 122.3     | -x+2, -y+3, -z+2 |
|       | C17B-H17B...S2A | 2.96      | 3.667(2)  | 134.3     | x, y+1, z        |
|       | C18B-H18B...O3B | 2.53      | 3.400(3)  | 155.7     | x, y+1, z        |
|       | C19B-H19D...O1A | 2.66      | 3.333(2)  | 126.8     | x+1, y, z        |
| 7     | O3A-H3A...O2B   | 1.80(4)   | 2.633(2)  | 173(4)    | -x, -y-1, -z+1   |
|       | O3B-H3B...O2A   | 1.75(5)   | 2.667(2)  | 169(4)    | -x, -y-1, -z+1   |
|       | C6A-H6A...O1B   | 2.60      | 3.374(3)  | 140.8     | -x+1, -y, -z+1   |
|       | C13A-H13A...O3A | 2.58      | 3.391(3)  | 141.0     | x+1, y+1, z      |
|       | C13A-H13C...O1A | 2.63      | 3.460(3)  | 143.7     | -x+2, -y, -z+1   |
|       | C13B-H13D...O3B | 2.56      | 3.314(3)  | 135.1     | x+1, y+1, z      |
|       | C18A-H18A...O3A | 2.92      | 3.625(3)  | 134.2     | -x+2, -y+1, -    |
|       | C21A-H21A...O3A | 2.57      | 3.453(3)  | 151.0     | -x+1, -y-1, -z+1 |
| 11    | O3-H3...O2      | 1.76(3)   | 2.645(2)  | 177(3)    | -x, -y+1, -z+2   |
|       | C9-H9...O1      | 2.62      | 3.392(2)  | 139.0     | -x+2, -y+1, -z+1 |
|       | C14-H14...S2    | 2.98      | 3.673(2)  | 131.4     | -x+2, -y, -z+1   |
|       | C16-H16...O2    | 2.70      | 3.488(2)  | 140.2     | -x+2, -y+1, -z+1 |
|       | C17-H17...O3    | 2.78      | 3.541(2)  | 137.2     | -x+2, -y+1, -z+1 |
|       | C18-H18...O2    | 2.49      | 3.353(2)  | 151.8     | -x+1, -y+1, -z+1 |
|       | C21-H21...S2    | 3.02      | 3.583(2)  | 106.2     | -x+1, -y, -z+1   |
|       | C24-H24...O3    | 2.61      | 3.466(2)  | 149.8     | x+1, y, z-1      |

**Table S3.** Docking scores, MM/GBSA free energy of binding and interactions observed for complexes of the hPgp homology model with the docked ligands.

| Compound      | XP GScore | IFD Score | MMGBSA $\Delta G$ |                  | $\pi \cdots \pi$                    | Interacting residues within 4Å                                                                                                                                                                                                              |
|---------------|-----------|-----------|-------------------|------------------|-------------------------------------|---------------------------------------------------------------------------------------------------------------------------------------------------------------------------------------------------------------------------------------------|
|               |           |           | kcal/mol          | H-bond           |                                     |                                                                                                                                                                                                                                             |
| Verapamil     | -9.387    | -2651.60  | -87.19            | Tyr307<br>Tyr953 | Phe983                              | TM1: Leu65, Met69, Phe72<br>TM5: Ile306, Tyr307, Tyr310<br>TM6: Phe335, Phe336, Phe343<br>TM7: Gln725, Phe728, Ala729, Phe732<br>TM8: Phe759<br>TM9: Asn842<br>TM11: Tyr953, Phe957<br>TM12: Leu975, Phe978, Ser979, Phe983, Met986, Ala987 |
| 11<br>pose Ia | -11.031   | -2660.88  | -87.96            | Gln946<br>Tyr950 | Phe336<br>Phe732<br>Phe983          | TM1: His61, Leu65, Met68, Met69<br>TM5: Tyr310<br>TM6: Leu332, Phe336<br>TM7: Phe728, Ala729, Phe732, Ile736<br>TM11: Gln946, Met949, Tyr950, Tyr953<br>TM12: Leu975, Phe978, Ser979, Val982, Phe983, Met986                                |
| 11<br>pose Ib | -9.028    | -2659.08  | -68.07            | Gln347           | Phe72<br>Phe732<br>Phe978<br>Phe983 | TM1: Leu65, Met69, Phe72<br>TM3: Thr199<br>TM6: Leu332, Phe336, Ile340, Phe343, Ser344, Gln347<br>TM7: Phe728, Ala729, Phe732, Ile736<br>TM11: Tyr953<br>TM12: Leu975, Phe978, Ser979, Val982, Phe983, Met986                               |

**Table S4.** Docking scores, MM/GBSA free energy of binding and interactions observed for complexes of the cryo-EM structure 7O9W with the docked ligands.

| Compound      | XP GScore | IFD Score | MMGBSA $\Delta G$ |                                | $\pi \cdots \pi$ | Interacting residues within 4Å                                                                                                                                                                                                                       |
|---------------|-----------|-----------|-------------------|--------------------------------|------------------|------------------------------------------------------------------------------------------------------------------------------------------------------------------------------------------------------------------------------------------------------|
|               |           |           | kcal/mol          | H-bond                         |                  |                                                                                                                                                                                                                                                      |
| Verapamil     | -10.974   | -2243.60  | -102.10           | Tyr307<br>Tyr953<br>Gln990 x 2 | Phe983           | TM1: Met69, Phe72<br>TM5: Phe303, Ile306, Tyr307, Tyr310<br>TM6: Phe336<br>TM7: Leu724, Gln725, Phe728, Ala729, Phe732<br>TM8: Phe770<br>TM9: Asn842<br>TM11: Tyr953, Phe957<br>TM12: Leu975, Phe978, Ser979, Phe983, Met986, Ala987, Gln990, Val991 |
| 11<br>pose II | -9.328    | -2239.03  | -92.06            | Gln347                         | Phe336<br>Phe978 | TM1: Leu65, Met69, Phe72, Gly73, Thr76<br>TM5: Tyr310<br>TM6: Leu332, Thr333, Phe336, Leu339, Ile340, Phe343, Ser344, Gln347<br>TM7: Phe728, Phe732<br>TM11: Tyr953, Phe957<br>TM12: Leu975, Phe978, Ser979, Phe983                                  |

**Table S5.** Comparison of predicted selected physicochemical properties.

| <b>No.</b> | <b>Log P</b> | <b>Log S</b> |
|------------|--------------|--------------|
| <b>1</b>   | 3.69         | -5.47        |
| <b>2</b>   | 3.90         | -5.27        |
| <b>3</b>   | 4.04         | -5.27        |
| <b>4</b>   | 4.67         | -5.37        |
| <b>5</b>   | 3.78         | -5.47        |
| <b>6</b>   | 3.66         | -5.27        |
| <b>7</b>   | 3.80         | -5.28        |
| <b>8</b>   | 4.15         | -5.41        |
| <b>9</b>   | 5.19         | -5.80        |
| <b>10</b>  | 5.17         | -5.60        |
| <b>11</b>  | 5.17         | -5.57        |
| <b>12</b>  | 5.33         | -5.64        |

Values predicted using ALOGPS 2.1 applet of the Virtual Computational Chemistry Laboratory (<http://www.vclab.org>).
